# Supplementary material for: Weighing the Association Between BMI Change and Suicide Mortality
Source: Atypon-hosted journal article supplement (doi:10.1176/appi.ps.202000475), 2021-04-22
Supplement: appi.ps.202000475.ds001.pdf [file appi.ps.202000475.ds001.pdf]

 


Psychiatry Online
