# Supplementary material for: Weighing the Association Between BMI Change and Suicide Mortality
Source: Atypon-hosted journal article supplement (doi:10.1176/appi.ps.202000475), 2021-04-22
Supplement: appi.ps.202000475.ds001.pdf [file appi.ps.202000475.ds001.pdf]

**APPENDIX 1.** Comparison of the suicide decedents in the analytic sample and those excluded from analysis<sup>a</sup>

| Characteristic                                | All suicide decedents             |      |                                         |      | p      |
|-----------------------------------------------|-----------------------------------|------|-----------------------------------------|------|--------|
|                                               | In the analytic sample<br>(N=387) |      | Excluded from the<br>analysis (N=2,730) |      |        |
|                                               | N                                 | %    | N                                       | %    |        |
| Age (M±SD)                                    | 57.18±19.90                       |      | 48.93±18.97                             |      | <.001  |
| Gender                                        |                                   |      |                                         |      | 0.003  |
| Female                                        | 111                               | 28.7 | 599                                     | 21.9 |        |
| Male                                          | 276                               | 71.3 | 2,131                                   | 78.1 |        |
| Race                                          |                                   |      |                                         |      | <.001  |
| White                                         | 265                               | 68.5 | 1,209                                   | 44.3 |        |
| Non-White                                     | 46                                | 11.9 | 220                                     | 8.1  |        |
| Unknown                                       | 76                                | 19.6 | 1,301                                   | 47.7 |        |
| Neighborhood poverty level                    |                                   |      |                                         |      | 0.119  |
| Higher than low income                        | 284                               | 73.4 | 1,899                                   | 69.6 |        |
| Low income                                    | 33                                | 8.5  | 211                                     | 7.7  |        |
| Missing                                       | 70                                | 18.1 | 620                                     | 22.7 |        |
| Neighborhood education                        |                                   |      |                                         |      | 0.182  |
| :25% college graduates                        | 236                               | 61.0 | 1,642                                   | 60.2 |        |
| <25% college graduates                        | 135                               | 34.9 | 1,017                                   | 37.3 |        |
| Missing                                       | 16                                | 4.1  | 71                                      | 2.6  |        |
| Comorbid medical illness <sup>b</sup>         |                                   |      |                                         |      | <0.001 |
| Charlson score of 0                           | 165                               | 42.6 | 1,619                                   | 59.3 |        |
| Charlson score >0                             | 221                               | 57.1 | 823                                     | 30.2 |        |
| Mental or substance use disorder <sup>c</sup> |                                   |      |                                         |      | 0.052  |
| No                                            | 298                               | 77.0 | 2,216                                   | 81.2 |        |
| Yes                                           | 89                                | 23.0 | 514                                     | 18.8 |        |
| Depression diagnosis                          |                                   |      |                                         |      | <0.001 |
| No                                            | 174                               | 45.0 | 1,627                                   | 59.6 |        |
| Yes                                           | 213                               | 55.0 | 1,103                                   | 40.4 |        |

<sup>a</sup>Means were compared by t tests, and proportions were compared by chi-square tests.

<sup>b</sup>The Charlson Index was calculated using *ICD-9* codes from clinical diagnoses. Total score is categorized as a binary variable.

<sup>c</sup>*ICD-9*: 290–319, excluding depression diagnoses (*ICD-9* codes: 2962, 2963, 296.82, 2980, 3004, 301.12, 3090, 3091, 309.28, and 311).
